# Supplementary material
Source: PubMed Central journal article supplement (PMC3155164)
Supplement: mmc1.pdf [file mmc1.pdf]

The American Journal of Human Genetics, Volume 89  
Supplemental Data

**Exome Sequencing Identifies a *DYNC1H1* Mutation  
in a Large Pedigree with Dominant Axonal  
Charcot-Marie-Tooth Disease**

Michael N. Weedon, Robert Hastings, Richard Caswell, Weijia Xie, Konrad Paszkiewicz, Thalia  
Antoniadi, Maggie Williams, Cath King, Lynn Greenhalgh, Ruth Newbury-Ecob, and Sian  
Ellard

**Table S1.** Exome sequence alignment and coverage data. CCDS bases refer to the exonic bases from the September 2008 CCDS release and the cumulative number of these target bases that were covered with increasing read depth is presented.

| <b>Individual</b>             | <b>IV-2</b>   | <b>IV-7</b>   | <b>IV-14</b>  |
|-------------------------------|---------------|---------------|---------------|
| Total reads                   | 78,538,784    | 84,024,940    | 80,266,112    |
| Total sequence (bases)        | 5,968,947,584 | 6,385,895,440 | 6,100,224,512 |
| Aligned Reads                 | 68,551,918    | 71,239,522    | 69,352,229    |
| Uniquely Aligned Reads        | 64,008,530    | 66,630,886    | 64,675,318    |
| Total bait bases              | 37,792,908    | 37,792,908    | 37,792,908    |
| Total CCDS target bases       | 27,484,507    | 27,484,507    | 27,484,507    |
| CCDS bases covered $\geq 1X$  | 26,604,824    | 26,496,548    | 26,526,222    |
| CCDS bases covered $\geq 4X$  | 25,459,911    | 25,278,509    | 25,329,116    |
| CCDS bases covered $\geq 10X$ | 23,583,984    | 23,416,289    | 23,463,106    |
| CCDS bases covered $\geq 20X$ | 20,992,799    | 20,940,420    | 21,024,746    |
| Bait bases covered $\geq 20X$ | 28,200,599    | 28,203,872    | 28,368,627    |
| Average bait base coverage    | 64            | 66            | 65            |
| Average CCDS base coverage    | 69            | 71            | 70            |

**Table S2.** Breakdown of variants identified. Only bases covered  $\geq 4X$  were included. Ti/Tv refers to the transition/transversion ratio. Target bases refer to the exonic bases from the September 2008 CCDS release.

| <b>Individual</b>                                                                                                | <b>IV-2</b> | <b>IV-7</b> | <b>IV-14</b> |
|------------------------------------------------------------------------------------------------------------------|-------------|-------------|--------------|
| Total Variants                                                                                                   | 24,208      | 24,237      | 24,484       |
| Total Variants in target region                                                                                  | 14,997      | 14,930      | 15,170       |
| Ti/Tv ratio of total coding region variants                                                                      | 3.37        | 3.46        | 3.39         |
| Novel variants in coding region after dbSNP131, 1000 genomes and 11 "in house" control exome filtering (het/hom) | 177/6       | 192/7       | 199/8        |
| Ti/Tv of novel coding variants                                                                                   | 2.77        | 2.25        | 2.00         |
| Novel missense                                                                                                   | 168         | 183         | 197          |
| Novel nonsense                                                                                                   | 4           | 8           | 2            |
| Novel frameshift                                                                                                 | 9           | 8           | 7            |
| Novel splice site                                                                                                | 2           | 0           | 1            |

|                        |     | exon 5                                            | ↓ | exon 6                 |     |
|------------------------|-----|---------------------------------------------------|---|------------------------|-----|
| Human                  | 269 | GTALQEISFWLNLERALYRIQEKRESPEVLLTLDILKHGKRFHATVSFD |   | TGLKQALETVNDYNPLMKDFPL | 341 |
| Chimpanzee             | 269 | GTALQEISFWLNLERALYRIQEKRESPEVLLTLDILKHGKRFHATVSFD |   | TGLKQALETVNDYNPLMKDFPL | 341 |
| Rhesus macaque         | 269 | GTALQEISFWLNLERALYRIQEKRESPEVLLTLDILKHGKRFHATVSFD |   | TGLKQALETVNDYNPLMKDFPL | 341 |
| Dog                    | 263 | GTALQEISFWLNLERALYRIQEKRESPEVLLTLDILKHGKRFHATVSFD |   | TGLKQALETVNDYNPLMKDFPL | 335 |
| Mouse                  | 267 | GTALQEISFWLNLERALYRIQEKRESPEVLLTLDILKHGKRFHATVSFD |   | TGLKQALETVNDYNPLMKDFPL | 339 |
| Rat                    | 267 | GTALQEISFWLNLERALYRIQEKRESPEVLLTLDILKHGKRFHATVSFD |   | TGLKQALETVNDYNPLMKDFPL | 339 |
| Chicken                | 268 | GTALQEISFWLNLERALYRIQEKRESPEVLLTLDILKHGKRFHATVSFD |   | TGLKQALETVNDYNPLMKDFPL | 341 |
| <i>X. tropicalis</i>   | 268 | GTALQEISFWLNLERALYRIQEKRESPEVLLTLDILKHGKRFHATVSFD |   | TGLKQALETVNDYNPLMKDFPL | 340 |
| Zebrafish              | 268 | GTALQEISFWLNLERALYRIQEKRESPEVLLTLDILKHGKRFHATVSFD |   | TGLKQALETVNDYNPLMKDFPL | 340 |
| <i>Fugu rubripes</i>   | 269 | GTALQEISFWLNLERALYRIQEKRESPEVLLTLDILKHGKRFHATVSFD |   | TGLKQALETVNDYNPLMKDFPL | 341 |
| <i>T. nigroviridis</i> | 250 | GTALQEISFWLNLERALYRIQEKRESPEVLLTLDILKHGKRFHATVSFD |   | TGLKQALETVNDYNPLMKDFPL | 322 |
| <i>D. melanogaster</i> | 269 | GTALQEISFWLNLERALYRIQEKRESPEVLLTLDILKHGKRFHATVSFD |   | TGLKQALETVNDYNPLMKDFPL | 341 |
| <i>A. gambiae</i>      | 277 | GTALQEISFWLNLERALYRIQEKRESPEVLLTLNLIKHGKRFHATVSFD |   | TGLKQALETVNDYNPLMKDFPL | 349 |

### Figure S1. Sequence Conservation in DYNC1H1 Stem Region

The sequence of human DYNC1H1 amino acids 269-341 is shown aligned to orthologues from other species. For the human sequence, residues encoded by exons 5 and 6 are shown in black and blue font respectively; Gly321, the codon for which lies across the exon junction, is shown in red. The position of His306 is shown by an arrow above the sequence. Positions of non-identity with the human sequence are shown by inverted type in orthologous sequences. The *in silico* tools SIFT<sup>1</sup>, PolyPhen2<sup>2</sup> and Mutation Taster<sup>3</sup> all predict that the p.His306Arg mutation is likely to be pathogenic.

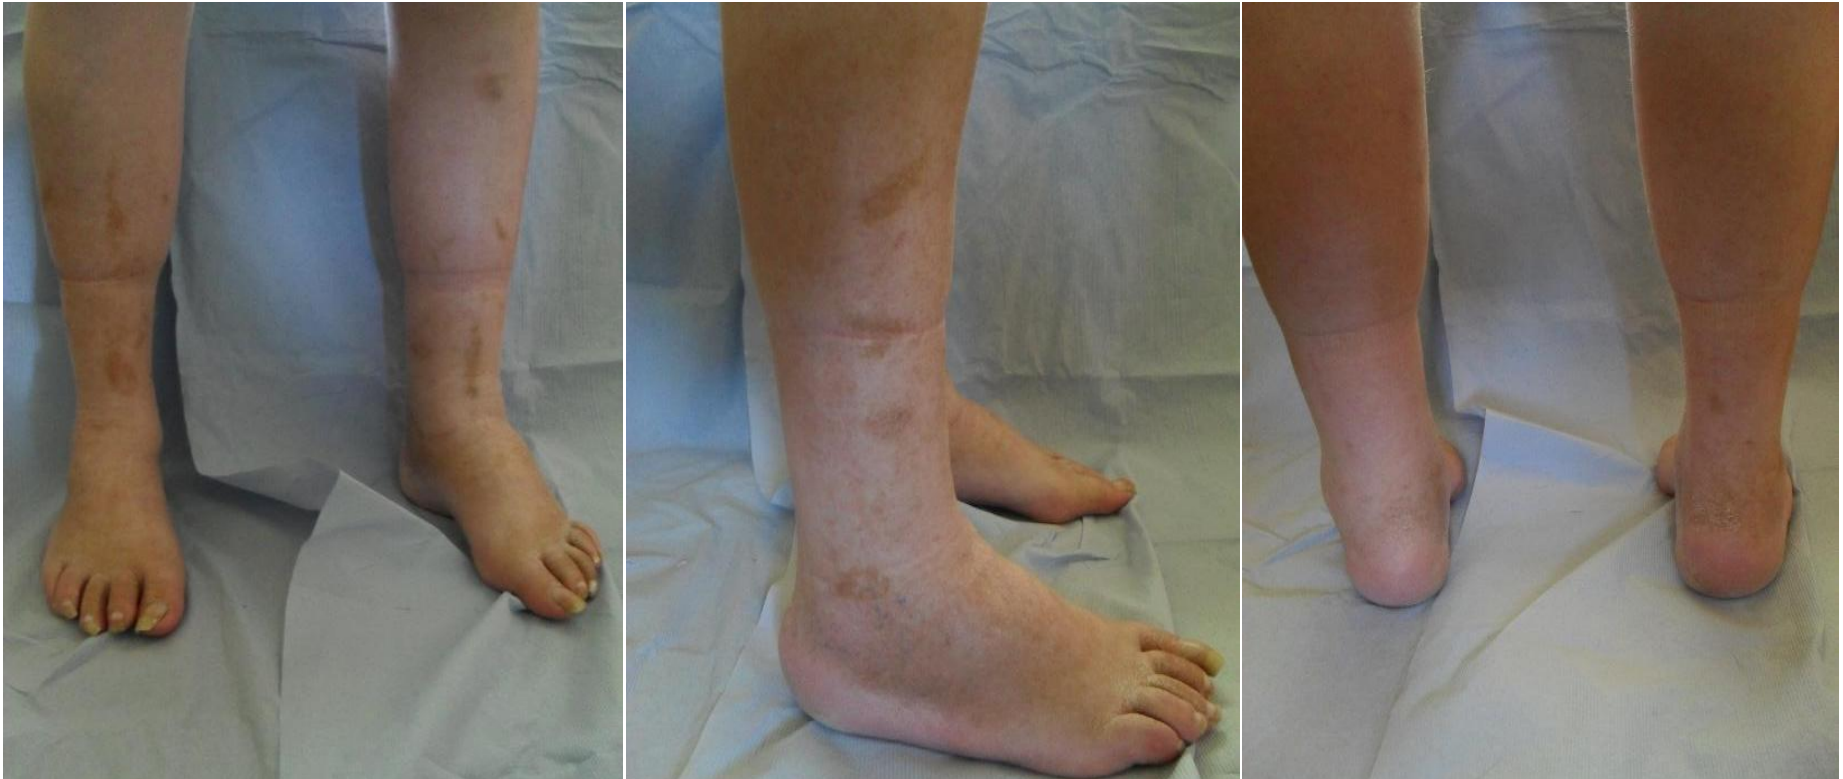

**Figure S2. Lower legs of patient II 13 at age 58 Demonstrating Calf Atrophy and Hair Loss**

### **Supplementary References**

1. Kumar, P., Henikoff, S. & Ng, P.C. Predicting the effects of coding non-synonymous variants on protein function using the SIFT algorithm. *Nat Protoc* **4**, 1073-81 (2009).
2. Adzhubei, I.A. et al. A method and server for predicting damaging missense mutations. *Nat Methods* **7**, 248-9 (2010).
3. Schwarz, J.M., Rodelsperger, C., Schuelke, M. & Seelow, D. MutationTaster evaluates disease-causing potential of sequence alterations. *Nat Methods* **7**, 575-6 (2010).
